# Supplementary material for: Who Still Gets Ligated? Reasons for Persistence of Surgical Ligation of the Patent Ductus Arteriosus Following Availability of Transcatheter Device Occlusion for Premature Neonates
Source: MDPI journal article supplement (doi:10.3390/jcdd11050132), 2024-04-23
Supplement: s1 [file s1]

| Characteristics                              | Abdominal<br>pathology <sup>1</sup><br>N=7 | Unfavorable<br>PDA anatomy <sup>2</sup><br>N=8 | Active<br>infection <sup>3</sup><br>N=9 | p-value |
|----------------------------------------------|--------------------------------------------|------------------------------------------------|-----------------------------------------|---------|
| <b>Demographics</b>                          |                                            |                                                |                                         |         |
| Gestational age (weeks)                      | 25 (24, 26)                                | 25 (24, 28)                                    | 24 (23, 24)                             | 0.112   |
| Birth weight (grams)                         | 680 (620, 793)                             | 710 (600, 951)                                 | 670 (640, 690)                          | 0.751   |
| Birth weight Z-scores                        | -0.01 (-0.14, 0.23)                        | -0.48 (-0.94, 0.78)                            | 0.44 (0.18, 0.74)                       | 0.418   |
| Sex (female)                                 | 3 (43%)                                    | 6 (75%)                                        | 3 (33%)                                 | 0.266   |
| Age at procedure (days)                      | 19 (14, 21)                                | 41 (34, 75)                                    | 39 (25, 43)                             | 0.010   |
| Postmenstrual age at procedure<br>(weeks)    | 28 (28, 31)                                | 27 (0, 32)                                     | 28 (27, 29)                             | 0.687   |
| Weight at procedure (grams)                  | 745 (665, 875)                             | 1,550 (975, 2,150)                             | 910 (800, 1,185)                        | 0.021   |
| Procedure weight Z-scores                    | -1.38 (-1.43, -0.99)                       | -1.14 (-2.72, -0.78)                           | -0.98 (-1.49, -0.69)                    | 0.915   |
| Pharmacotherapy before closure               | 4 (57%)                                    | 7 (88%)                                        | 7 (78%)                                 | 0.432   |
| #of pharmacotherapy courses                  | 1 (0, 2)                                   | 2 (1, 2)                                       | 2 (1, 2)                                | 0.475   |
| <b>Common comorbidities prior to closure</b> |                                            |                                                |                                         |         |
| Necrotizing enterocolitis (≥ Bells Stage II) | 6 (86%)                                    | 0 (0%)                                         | 0 (0%)                                  | 0.000   |
| Intraventricular hemorrhage (any<br>IVH)     | 3 (43%)                                    | 1 (14%)                                        | 6 (67%)                                 | 0.126   |
| Grade III/IV IVH                             | 2 (29%)                                    | 0 (0%)                                         | 3 (33%)                                 | 0.314   |
| <b>Post-procedural respiratory outcomes</b>  |                                            |                                                |                                         |         |
| High frequency ventilation                   | 3 (43%)                                    | 2 (29%)                                        | 2 (25%)                                 | 0.855   |
| Duration of mechanical ventilation<br>(days) | 8 (5, 15)                                  | 26 (13, 30)                                    | 43 (14, 70)                             | 0.327   |

Data is reported as n (%)

PDA, patent ductus arteriosus

<sup>1</sup>Defined as Bells Stage II necrotizing enterocolitis within two weeks of referral or spontaneous intestinal perforation with a Penrose drain

<sup>2</sup>Defined as echocardiographic evidence of cortication of the aorta or left pulmonary artery stenosis, and a ductus that was < 3 mm in length and < 4 mm in diameter

<sup>3</sup>Defined as culture positive bacteremia and on antibiotics at the time of definitive closure consideration

**Online Supplement Table S1:** Demographic and clinical comparisons by indication for surgical ligation
